# Supplementary material
Source: publisher site journal article supplement (https://www.dovepress.com/article/271011)
Supplement: Supplementary file 1 [file get_supplementary_file.php]

**Supplementary Data**

**High PD-L1 expression is associated with unfavorable clinical outcome in *EGFR*-mutated lung adenocarcinomas treated with targeted therapy**

**Table S1** List of uncommon or compound mutations (n=15)

| Mutations | No. (%) |
| --- | --- |
| L816Q | 3 (20) |
| G719A | 4 (27) |
| G719S | 2 (13) |
| G719A + L858R | 2 (13) |
| Exon 20 insertion | 2 (13) |
| Exon 20 insertion + L858R | 1 (7) |
| T790M + L858R | 1 (7) |

**Table S2** Response rate according to the PD-L1 TPS and *EGFR* mutational subtypes

|  | Overall  (n=131) | *EGFR* mutational subtypes | | |
| --- | --- | --- | --- | --- |
|  | 19del (n=64) | L858R (n=52) | others (n=15) |
| PD-L1 TPS <1% (n=65) | 51/65 (78.5%) | 30/37 (81.1%) | 18/23 (78.3%) | 3/5 (60.0%) |
| PD-L1 TPS 1-49% (n=43) | 31/43 (72.1%) | 13/18 (72.2%) | 13/18 (72.2%) | 5/7 (71.4%) |
| PD-L1 TPS ≥50% (n=23) | 10/23 (43.5%) | 4/9 (44.4%) | 5/11 (45.5%) | 1/3 (33.3%) |

**Table S3** Progression-free survival analyses results according to clinicopathological parameters for the patients with exon 19 deletion (n=64)

|  | Median PFS  (months) | Univariate | | Multivariate | |
| --- | --- | --- | --- | --- | --- |
| HR (95% CI) | p-value | HR (95% CI) | p-value |
| All | 16.3 |  |  |  |  |
| Age (years) |  |  | 0.773 | NA |  |
| <70 | 14.0 | reference |  |  |  |
| ≥70 | 18.9 | 0.91 (0.52-1.68) |  |  |  |
| Sex |  |  | 0.035 |  | 0.045 |
| Female | 19.1 | reference |  | reference |  |
| Male | 12.1 | 1.96 (1.05-3.68) |  | 1.91 (1.02-3.71) |  |
| Smoking history |  |  | 0.354 | NA |  |
| Never | 18.7 | reference |  |  |  |
| Ever | 12.3 | 1.37 (0.7-2.67) |  |  |  |
| Smoking intensity |  |  | 0.463 | NA |  |
| < 30 pack-year | 15.3 | reference |  |  |  |
| ≥30 pack-year | 18.9 | 1.39 (0.64-2.69) |  |  |  |
| ECOG PS |  |  | 0.214 |  | 0.569 |
| 0,1 | 18.7 | reference |  | reference |  |
| ≥2 | 12.9 | 1.56 (0.77-3.14) |  | 1.23 (0.61-2.63) |  |
| Stage |  |  | 0.082 |  | 0.151 |
| III | 17.7 | reference |  | reference |  |
| IV | 13.2 | 1.68 (0.84-7.55) |  | 1.78 (0.85-4.14) |  |
| Organ involved |  |  | 0.017 |  | 0.077 |
| ≤3 | 18.9 | reference |  | reference |  |
| >3 | 11.1 | 2.74 (1.32-6.25) |  | 1.98 (0.58-3.20) |  |
| Brain metastasis |  |  | 0.194 |  | 0.299 |
| No | 19.1 | reference |  | reference |  |
| Yes | 12.3 | 1.53 (0.83-2.92) |  | 1.42 (0.72-2.91) |  |
| Liver metastasis |  |  | 0.355 | NA |  |
| No | 18.7 | reference |  |  |  |
| Yes | 12.0 | 1.52 (0.63-3.65) |  |  |  |
| First line TKI |  |  | 0.068 |  | 0.125 |
| Gefitinib/erlotinib | 12.1 | 1.72 (0.63-3.65) |  | 1.83 (0.81-3.79) |  |
| Afatinib | 18.6 | reference |  | reference |  |
| PD-L1 TPS |  |  | 0.002 |  | 0.036 |
| <50% | 18.9 | reference |  | reference |  |
| ≥50% | 8.9 | 4.33 (1.76-10.63) |  | 3.85 (1.23-11.92) |  |

ECOG PS, Eastern Cooperative Oncology Group Performance Status; EGFR, epidermal growth factor receptor; TKI, tyrosine kinase inhibitor; PD-L1 TPS, programmed death ligand-1 tumor proportional score; HR, hazard ratio; CI, confidence interval; NA, not analyzed

**Table S4** Progression-free survival analyses results according to clinicopathological parameters for the patients with L858R (n=52)

|  | Median PFS  (months) | Univariate | | | Multivariate | | |
| --- | --- | --- | --- | --- | --- | --- | --- |
| HR (95% CI) | *p-value | | HR (95% CI) | | †p-value |
| All | 12.8 |  |  | |  | |  |
| Age (years) |  |  | 0.839 | | NA | |  |
| <70 | 12.6 | reference |  | |  | |  |
| ≥70 | 12.3 | 1.08 (0.51-2.27) |  | |  | |  |
| Sex |  |  | 0.684 | | NA | |  |
| Male | 10.4 | reference |  | |  | |  |
| Female | 11.9 | 1.17 (0.55-2.50) |  | |  | |  |
| Smoking history |  |  | 0.566 | | NA | |  |
| Never | 13.4 | reference |  | |  | |  |
| Ever | 12.3 | 0.80 0.36-1.74) |  | |  | |  |
| ECOG PS |  |  | 0.347 | | NA | |  |
| 0,1 | 12.6 | reference |  | |  | |  |
| ≥2 | 12.3 | 0.65 (0.26-1.61) |  | |  | |  |
| Stage |  |  | 0.622 | | NA | |  |
| III | 15.2 | reference |  | |  | |  |
| IV | 12.3 | 1.44 (0.34-6.11) |  | |  | |  |
| Organ involved |  |  | 0.035 | |  | | 0.089 |
| ≤3 | 16.1 | reference |  | | reference | |  |
| >3 | 13.3 | 2.14 (0.94-5.18) |  | | 1.43 (0.64-6.27) | |  |
| Brain metastasis |  |  | 0.756 | |  | |  |
| No | 13.2 | reference |  | | NA | |  |
| Yes | 12.3 | 1.14 (0.50-2.60) |  | |  | |  |
| Liver metastasis |  |  | 0.151 | |  | | 0.241 |
| No | 13.2 | reference |  | | reference | |  |
| Yes | 11.9 | 1.82 (0.79-4.52) |  | | 1.69 (0.86-3.17) | |  |
| First line TKI |  |  | 0.068 |  | | 0.125 | | |
| Gefitinib/erlotinib | 12.1 | 1.72 (0.63-3.65) |  | 1.83 (0.81-3.79) | |  | | |
| Afatinib | 17.5 | reference |  | reference | |  | | |
| PD-L1 TPS |  |  | 0.007 | |  | | 0.010 |
| <50% | 14.4 | reference |  | | reference | |  |
| ≥50% | 8.0 | 3.29 (1.43-8.35) |  | | 2.15 (1.12-6.98) | |  |

ECOG PS, Eastern Cooperative Oncology Group Performance Status; EGFR, epidermal growth factor receptor; TKI, tyrosine kinase inhibitor; PD-L1 TPS, programmed death ligand-1 tumor proportional score; HR, hazard ratio; CI, confidence interval; NA, not analyzed

**Table S5** Overall survival analyses results according to clinicopathological parameters of all study subjects (n=131)

|  | Median OS  (months) | Univariate | | | Multivariate | | |
| --- | --- | --- | --- | --- | --- | --- | --- |
| HR (95% CI) | | *p*-value | | HR (95% CI) | *p*-value |
| All | 36.8 | |  |  | |  |  |
| Age (years) |  |  | | 0.360 | | NA |  |
| <70 | 35.4 | reference | |  | |  |  |
| ≥70 | 37.6 | 1.42 (0.77-2.61) | |  | |  |  |
| Sex |  |  | | 0.009 | |  | 0.098 |
| Female | 47.7 | reference | |  | | reference |  |
| Male | 30.3 | 2.26 (1.22-4.18) | |  | | 2.13 (0.87-5.11) |  |
| Smoking history |  |  | | 0.044 | |  | 0.534 |
| Never | 38.0 | reference | |  | | reference |  |
| Ever | 35.4 | 1.88 (1.02-3.49) | |  | | 1.54 (0.45-0.53) |  |
| ECOG PS |  |  | | 0.358 | | NA |  |
| 0,1 | 36.6 | reference | |  | |  |  |
| ≥2 | 38.0 | 1.4 (0.68-2.89) | |  | |  |  |
| Stage |  |  | | 0.472 | | NA |  |
| III | 38.6 | reference | |  | |  |  |
| IV | 37.4 | 1.68 (0.41-6.97) | |  | |  |  |
| Organ involved |  |  | | 0.002 | |  | 0.007 |
| ≤3 | 38.8 | reference | |  | | reference |  |
| >3 | 20.6 | 3.62 (1.82-7.2) | |  | | 3.05 (1.36-6.72) |  |
| Brain metastasis |  |  | | 0.104 | |  | 0.456 |
| No | 36.7 | reference | |  | | reference |  |
| Yes | 33.8 | 1.68 (0.9-3.16) | |  | | 1.34 (0.64-2.71) |  |
| Liver metastasis |  |  | | 0.033 | |  | 0.049 |
| No | 38.8 | reference | |  | | reference |  |
| Yes | 21.2 | 2.19 (1.07-4.49) | |  | | 2.46 (1.10-5.76) |  |
| EGFR-mutation subtypes |  |  | | 0.345 | | NA |  |
| 19del | 35.5 | reference | |  | |  |  |
| L858R | 33.9 | 1.21 (0.51-2.96) | |  | |  |  |
| Others | 30.0 | 1.33 (0.78-3.27) | |  | |  |  |
| First-line TKI |  |  | | 0.145 | |  | 0.214 |
| Gefitinib/erlotinib | 31.0 | 1.33 (0.98-3.45) | |  | | 1.41 (0.88-3.19) |  |
| Afatinib | 36.4 | reference | |  | | reference |  |
| PD-L1 TPS |  |  | | 0.194 | |  | 0.181 |
| <50% | 33.7 | reference | |  | | reference |  |
| ≥50% | 24.3 | 1.44 (0.62-3.37) | |  | | 1.35 (0.59-3.15) |  |

ECOG PS, Eastern Cooperative Oncology Group Performance Status; EGFR, epidermal growth factor receptor; TKI, tyrosine kinase inhibitor; PD-L1 TPS, programmed death ligand-1 tumor proportional score; HR, hazard ratio; CI, confidence interval; NA, not analyzed

**Table S6** Overall survival analyses results according to clinicopathological parameters for the patients with exon 19 deletion (n=64)

|  | Median OS  (months) | Univariate | | Multivariate | |
| --- | --- | --- | --- | --- | --- |
| HR (95% CI) | *p*-value | HR (95% CI) | *p*-value |
| All | 36.5 |  |  |  |  |
| Age (years) |  |  | 0.241 |  | 0.110 |
| <70 | 37.6 | reference |  | reference |  |
| ≥70 | 31.5 | 1.59 (0.73-3.45) |  | 2.32 (0.83-6.21) |  |
| Sex |  |  | 0.041 |  | 0.187 |
| Female | 42.8 | reference |  | reference |  |
| Male | 31.5 | 2.37(1.05-5.34) |  | 1.35 (0.34-4.72) |  |
| Smoking history |  |  | 0.095 |  | 0.165 |
| Never | 37.7 | reference |  | reference |  |
| Ever | 36.5 | 2.31 (0.89-4.54) |  | 2.60 (0.64-10.70) |  |
| ECOG PS |  |  | 0.045 |  | 0.256 |
| 0,1 | 39.5 | reference |  | reference |  |
| ≥2 | 32.6 | 2.42 (1.02-5.73) |  | 1.81 (0.66-4.81) |  |
| Stage |  |  | 0.361 | NA |  |
| III | 38.6 | reference |  |  |  |
| IV | 34.5 | 1.38 (0.85-3.16) |  |  |  |
| Organ involved |  |  | 0.001 |  | 0.036 |
| ≤3 | 37.7 | reference |  | reference |  |
| >3 | 20.3 | 5.75 (2.18-15.15) |  | 2.90 (1.07-9.23) |  |
| Brain metastasis |  |  | 0.186 |  | 0.487 |
| No | 37.6 | reference |  | reference |  |
| Yes | 31.5 | 1.96 (0.72-5.32) |  | 1.41 (0.51-4.10) |  |
| Liver metastasis |  |  | 0.013 |  | 0.048 |
| No | 37.6 | reference |  | reference |  |
| Yes | 23.5 | 4.11 (0.98-12.53) |  | 3.70 (1.01-10.86) |  |
| First-line TKI |  |  | 0.168 |  | 0.251 |
| Gefitinib/erlotinib | 31.5 | 1.38 (0.98-3.66) |  | 1.65 (0.89-3.45) |  |
| Afatinib | 36.9 | reference |  | reference |  |
| PD-L1 TPS |  |  | 0.006 |  | 0.041 |
| <50% | 37.7 | reference |  | reference |  |
| ≥50% | 19.5 | 4.02 (1.57-10.69) |  | 2.55 (1.17-6.40) |  |

ECOG PS, Eastern Cooperative Oncology Group Performance Status; EGFR, epidermal growth factor receptor; TKI, tyrosine kinase inhibitor; PD-L1 TPS, programmed death ligand-1 tumor proportional score; HR, hazard ratio; CI, confidence interval; NA, not analyzed

**Table S7** Overall survival analyses results according to clinicopathological parameters for the patients with L858R (n=52)

|  | Median OS  (months) | Univariate | | | Multivariate | | |
| --- | --- | --- | --- | --- | --- | --- | --- |
| HR (95% CI) | p-value | | HR (95% CI) | | p-value |
| All | 26.5 |  |  | |  | |  |
| Age (years) |  |  | 0.063 | |  | | 0.106 |
| <70 | 28.8 | reference |  | | reference | |  |
| ≥70 | 24.1 | 2.28 (0.94-8.52) |  | | 1.68 (0.59-4.75) | |  |
| Sex |  |  | 0.036 | |  | | 0.048 |
| Female | 32.8 | reference |  | | Reference | |  |
| Male | 26.9 | 2.37 (1.03-5.35) |  | | 2.11 (1.02-4.17) | |  |
| Smoking history |  |  | 0.088 | |  | | 0.241 |
| Never | 31.9 | reference |  | | reference | |  |
| Ever | 25.6 | 1.99 (0.66-4.89) |  | | 1.82 (0.48-3.65) | |  |
| ECOG PS |  |  | 0.068 | |  | | 0.179 |
| 0,1 | 30.6 | reference |  | | reference | |  |
| ≥2 | 26.8 | 2.40 (1.03-4.84) |  | | 2.24 (0.86-4.90) | |  |
| Stage |  |  | 0.363 | | NA | |  |
| III | 32.9 | Reference |  | |  | |  |
| IV | 27.7 | 1.37 (0.17-5.81) |  | |  | |  |
| Organ involved |  |  | 0.008 | |  | | 0.017 |
| ≤3 | 31.9 | reference |  | | reference | |  |
| >3 | 24.7 | 4.16 (1.28-12.04) |  | | 3.19 (1.12-10.21) | |  |
| Brain metastasis |  |  | 0.264 | |  | | 0.419 |
| No | 30.6 | reference |  | | reference | |  |
| Yes | 24.9 | 2.11 (0.91-4.93) |  | | 1.53 (0.11-3.50) | |  |
| Liver metastasis |  |  | 0.257 | |  | | 0.157 |
| No | 31.9 | reference |  | | reference | |  |
| Yes | 25.6 | 2.04 (0.59-7.00) |  | | 2.20 (0.77-8.12) | |  |
| First-line TKI |  |  | 0.216 |  | | 0.251 | | |
| Gefitinib/erlotinib | 24.5 | 1.38 (0.78-4.10) |  | 1.65 (0.89-4.45) | |  | | |
| Afatinib | 32.9 | reference |  | reference | |  | | |
| PD-L1 TPS |  |  | 0.214 | |  | | 0.232 |
| <50% | 29.4 | reference |  | | reference | |  |
| ≥50% | 24.1 | 2.19 (0.89-6.15) |  | | 2.08 (0.84-5.79) | |  |

ECOG PS, Eastern Cooperative Oncology Group Performance Status; EGFR, epidermal growth factor receptor; TKI, tyrosine kinase inhibitor; PD-L1 TPS, programmed death ligand-1 tumor proportional score; HR, hazard ratio; CI, confidence interval; NA, not analyzed

(A) (B)


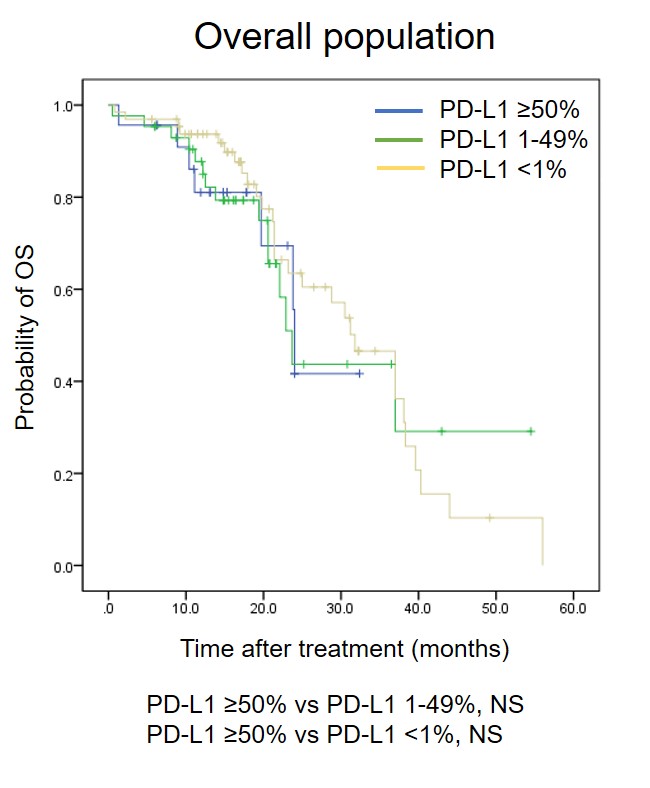

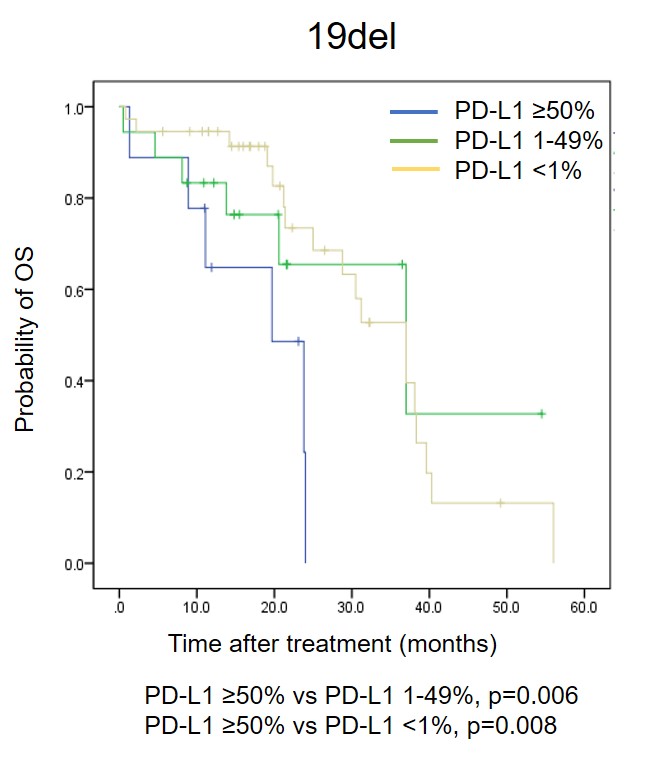


(C) (D)


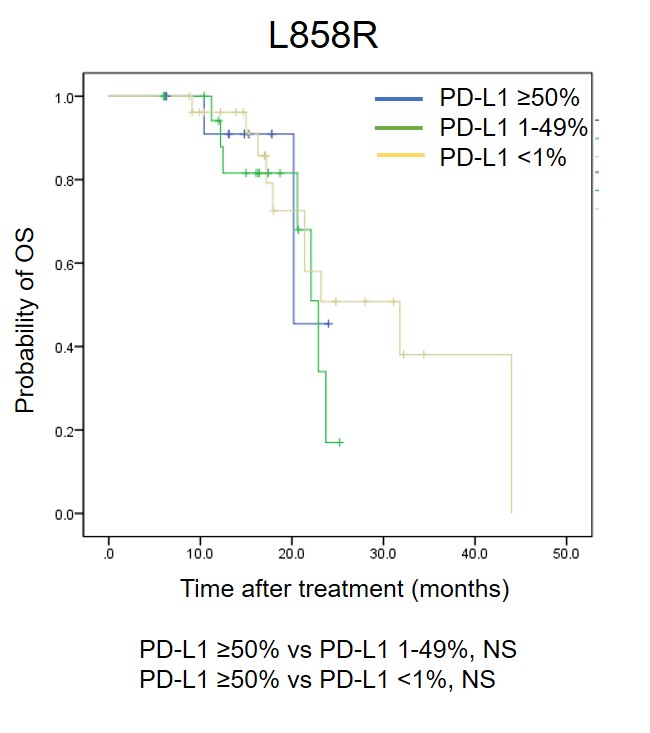

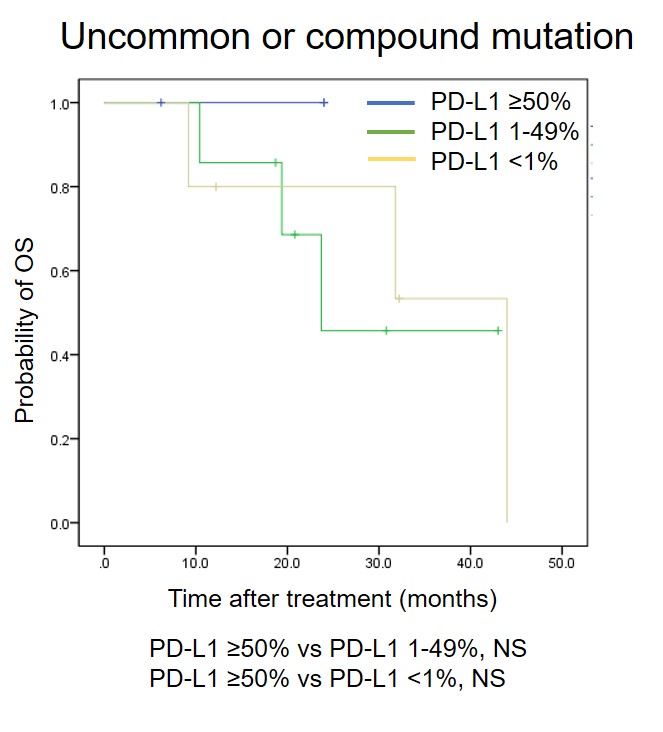


**Figure S1**. Kaplan-Meier curves of overall survival (OS) according to different PD-L1 TPS. (A) Overall population, (B) for the patients with exon 19 deletion, (C) for the patients with L858R mutation, and (D) for the patients with uncommon of compound mutation. *P*-values were determined using the log-rank test. NS, not significant
